# Supplementary material for: A new coronavirus associated with human respiratory disease in China
Source: Springer Nature journal article supplement (doi:10.1038/s41586-020-2008-3), 2020-02-03
Supplement: 41586_2020_2008_MOESM1_ESM.pdf [file 41586_2020_2008_MOESM1_ESM.pdf]

---

**Supplementary information**

---

**A new coronavirus associated with human respiratory disease in China**

---

In the format provided by the authors and unedited

Fan Wu, Su Zhao, Bin Yu, Yan-Mei Chen, Wen Wang, Zhi-Gang Song, Yi Hu, Zhao-Wu Tao, Jun-Hua Tian, Yuan-Yuan Pei, Ming-Li Yuan, Yu-Ling Zhang, Fa-Hui Dai, Yi Liu, Qi-Min Wang, Jiao-Jiao Zheng, Lin Xu, Edward C. Holmes & Yong-Zhen Zhang 

1 **Supplementary Information for:**  
2 **A novel coronavirus causing human respiratory disease in China**

3 Fan Wu<sup>1,6</sup>, Su Zhao<sup>2,6</sup>, Bin Yu<sup>3,6</sup>, Yan-Mei Chen<sup>1,6</sup>, Wen Wang<sup>4,6</sup>, Zhi-Gang Song<sup>1,6</sup>, Yi  
4 Hu<sup>2,6</sup>, Tao Zhao-Wu<sup>2</sup>, Jun-Hua Tian<sup>3</sup>, Yuan-Yuan Pei<sup>1</sup>, Ming-Li, Yuan<sup>2</sup>, Yu-Ling Zhang<sup>1</sup>, Fa-  
5 Hui Dai<sup>1</sup>, Yi Liu<sup>1</sup>, Qi-Min Wang<sup>1</sup>, Jiao-Jiao Zheng<sup>1</sup>, Lin Xu<sup>1</sup>, Edward C. Holmes<sup>5</sup>, Yong-  
6 Zhen Zhang<sup>1,4\*</sup>

7  
8 <sup>1</sup>Shanghai Public Health Clinical Center & School of Public Health, Fudan University,  
9 Shanghai, China.

10 <sup>2</sup>Department of Pulmonary and Critical Care Medicine, The Central Hospital of Wuhan,  
11 Tongji Medical College, Huazhong University of Science and Technology, Wuhan 430014,  
12 China.

13 <sup>3</sup>Wuhan Center for Disease Control and Prevention, Wuhan, Hubei, China

14 <sup>4</sup>Department of Zoonosis, National Institute for Communicable Disease Control and  
15 Prevention, Chinese Center for Disease Control and Prevention, Changping, Beijing, China.

16 <sup>5</sup>Marie Bashir Institute for Infectious Diseases and Biosecurity, School of Life and  
17 Environmental Sciences and School of Medical Sciences, The University of Sydney, Sydney,  
18 Australia.

19 <sup>6</sup>These authors contributed equally: Fan Wu, Su Zhao, Bin Yu, Yan-Mei Chen, Wen Wang,  
20 Zhi-Gang Song, Yi Hu. \*e-mail: [zhangyongzhen@shphc.org.cn](mailto:zhangyongzhen@shphc.org.cn)

21

22 Correspondence and requests for materials should be addressed to:

23 [zhangyongzhen@shphc.org.cn](mailto:zhangyongzhen@shphc.org.cn)

24 **Supplementary Tables**

25

26 **Supplementary Table 1.** The top 50 abundant assembled contigs generated using the  
27 Megahit program.

28 **Supplementary Table 2.** The top 80 abundant assembled contigs generated using the Trinity  
29 program.

30 **Supplementary Table 3.** Amino acid identities of the selected predicted gene products  
31 between the novel coronavirus (WHCV) and known betacoronaviruses.

32 **Supplementary Table 4.** Predicted cleavage products of the replicase polyproteins of  
33 WHCV.

34 **Supplementary Table 5.** Predicted gene functions of WHCV ORFs.

35 **Supplementary Table 6.** Coding of potential and putative transcription regulatory sequences  
36 of the genome sequence of WHCV.

37 **Supplementary Table 7.** Amino acid identities of the RBD sequence between SARS- and bat  
38 SARS-like CoVs.

39 **Supplementary Table 8.** PCR primers used in this study.

40 **Supplementary Table 1.** The top 50 abundant assembled contigs generated using the Megahit program.

| Contigs            | Length       | Abundance     | Result of blast against Nt database                                                     |               |           | Result of blast against Nr database                                                                                       |              |          |
|--------------------|--------------|---------------|-----------------------------------------------------------------------------------------|---------------|-----------|---------------------------------------------------------------------------------------------------------------------------|--------------|----------|
|                    |              |               | Blast hit                                                                               | Identity (%)  | e-value   | Blastx hit                                                                                                                | Identity (%) | e-value  |
| <b>k141_275316</b> | <b>30474</b> | <b>120396</b> | <b>MG772933 Bat SARS-like coronavirus isolate bat-SL-CoVZC45, complete genome</b>       | <b>89.113</b> | <b>0</b>  | <b>AVP78030.1 non-structural polyprotein 1ab [Bat SARS-like coronavirus]</b>                                              | <b>88.9</b>  | <b>0</b> |
| k141_56198         | 4633         | 225245.16     | CP012072 Actinomyces meyeri strain W712, complete genome                                | 95.006        | 0         | GAN11851.1 hydrolase, partial [Mucor ambiguus]                                                                            | 51.3         | 7.00E-61 |
| k141_76959         | 3696         | 130539.21     | CP001685 Leptotrichia buccalis DSM 1135, complete genome                                | 93.051        | 0         | EEX74124.1 hypothetical protein GCWU000323_01827 [Leptotrichia hofstadii F0254]                                           | 92.7         | 2.20E-49 |
| k141_179411        | 2733         | 87452.77      | CP012410 Leptotrichia sp. oral taxon 212 strain W10393, complete genome                 | 99.341        | 0         | EEX74022.1 hypothetical protein GCWU000323_01829 [Leptotrichia hofstadii F0254]                                           | 85.6         | 2.10E-52 |
| k141_132235        | 2540         | 598061.73     | CP019721 Veillonella parvula strain UTDB1-3, complete genome                            | 97.338        | 0         | ABP91180.1 unknown protein [Streptococcus suis 98HAH33]                                                                   | 63.8         | 6.60E-53 |
| k141_246050        | 2139         | 179525.89     | CP003667 Prevotella sp. oral taxon 299 str. F0039 plasmid, complete sequence            | 96.282        | 0         | EFC67102.1 LOW QUALITY PROTEIN: hypothetical protein HMPREF0670_02906, partial [Prevotella sp. oral taxon 317 str. F0108] | 77.8         | 7.50E-34 |
| k141_7767          | 1549         | 1355719.87    | CP019721 Veillonella parvula strain UTDB1-3, complete genome                            | 99.613        | 0         | CUP36263.1 Uncharacterised protein [Bacteroides xylanisolvens]                                                            | 62.6         | 2.30E-32 |
| k141_228454        | 1444         | 199997.19     | JX424618 Prevotella sp. Se00026 clone contig00026c genomic sequence                     | 89.646        | 0         | KWW26465.1 hypothetical protein AUK64_2547 [bacterium P201]                                                               | 76           | 7.60E-30 |
| k141_78882         | 1400         | 137390.81     | CP022386 Capnocytophaga gingivalis strain H1496 chromosome, complete genome             | 99.5          | 0         | KWW27340.1 hypothetical protein AUK64_2223 [bacterium P201]                                                               | 78.6         | 7.80E-48 |
| k141_46290         | 765          | 257373.81     | HQ616399 Prevotella sp. ICM55 16S ribosomal RNA gene, partial sequence                  | 99.213        | 0         | EDO51672.1 hypothetical protein BACUNI_04219 [Bacteroides uniformis ATCC 8492]                                            | 72.4         | 1.60E-23 |
| k141_67655         | 719          | 95201.85      | CP023863 Prevotella jejuni strain CD3:33 chromosome 1, complete sequence                | 92.094        | 0         | WP_044045810.1 hypothetical protein [Prevotella melaninogenica]                                                           | 81.7         | 8.70E-27 |
| k141_209219        | 671          | 99527.82      | CP019721 Veillonella parvula strain UTDB1-3, complete genome                            | 98.958        | 0         | EFG22293.1 hypothetical protein HMPREF0873_01746, partial [Veillonella sp. 3_1_44]                                        | 98           | 2.60E-17 |
| k141_132017        | 646          | 190579.71     | LT906445 Veillonella parvula strain NCTC11810 genome assembly, chromosome: 1            | 100           | 0         | CKL43271.1 Cell wall-associated hydrolase [Neisseria meningitidis]                                                        | 74           | 6.80E-63 |
| k141_2268          | 595          | 154024.63     | JQ459396 Uncultured bacterium clone 070027_126 16S ribosomal RNA gene, partial sequence | 99.138        | 1.63E-175 | AOE06246.1 hypothetical protein [uncultured bacterium]                                                                    | 55.4         | 2.00E-13 |
| k141_245870        | 569          | 429581.29     | CP023863 Prevotella jejuni strain CD3:33 chromosome 1, complete sequence                | 97.88         | 0         | EHG15578.1 hypothetical protein HMPREF9138_01799, partial [Prevotella histicola F0411]                                    | 93.6         | 2.70E-15 |
| k141_356852        | 558          | 175931.25     | FJ557960 Uncultured bacterium clone ET_G_3d09 16S ribosomal RNA gene, partial sequence  | 100           | 8.01E-89  | EHG15578.1 hypothetical protein HMPREF9138_01799, partial [Prevotella histicola F0411]                                    | 95.7         | 5.40E-16 |
| k141_225856        | 557          | 181751.03     | EF510660 Uncultured bacterium clone P2D11-613 16S ribosomal RNA gene                    | 100           | 0         | EDM19152.1 hypothetical protein BACCAC_03786 [Bacteroides caccae ATCC 43185]                                              | 79.5         | 2.90E-54 |
| k141_165136        | 556          | 390619.28     | CP023863 Prevotella jejuni strain CD3:33 chromosome 1, complete sequence                | 99.64         | 0         | KWW26465.1 hypothetical protein AUK64_2547 [bacterium P201]                                                               | 62.5         | 4.10E-32 |
| k141_39967         | 526          | 252641        | FJ557960 Uncultured bacterium clone ET_G_3d09 16S ribosomal RNA gene, partial sequence  | 98.289        | 0         | AOE11686.1 hypothetical protein [uncultured bacterium]                                                                    | 69.8         | 8.30E-19 |
| k141_72317         | 502          | 383496.8      | JQ459396 Uncultured bacterium clone 070027_126 16S ribosomal RNA gene, partial sequence | 99.452        | 0         | AOE06246.1 hypothetical protein [uncultured bacterium]                                                                    | 56.8         | 2.00E-14 |
| k141_218984        | 499          | 188987.21     | AP018049 Prevotella melaninogenica DNA, complete genome, strain: GAI 07411              | 97.595        | 0         | EDY97039.1 hypothetical protein BACPLE_00421 [Bacteroides plebeius DSM 17135]                                             | 86.2         | 9.30E-36 |
| k141_9212          | 499          | 152834.88     | CP023863 Prevotella jejuni strain CD3:33 chromosome 1, complete sequence                | 94.567        | 0         | KWW24027.1 hypothetical protein F082_2040 [bacterium F082]                                                                | 68.4         | 8.20E-24 |
| k141_281403        | 479          | 180948.65     | CP022041 Prevotella melaninogenica strain FDAARGOS_306 chromosome 2, complete sequence  | 94.395        | 6.29E-144 | CUO90010.1 Uncharacterised protein [Prevotella copri]                                                                     | 93.8         | 1.00E-07 |

|             |     |            |                                                                                           |        |           |                                                                                                                           |      |          |
|-------------|-----|------------|-------------------------------------------------------------------------------------------|--------|-----------|---------------------------------------------------------------------------------------------------------------------------|------|----------|
| k141_290049 | 476 | 85912.6    | CP013195 Prevotella enocca strain F0113, complete genome                                  | 95.607 | 0         | ETD26335.1 hypothetical protein HMPREF1173_02303 [Prevotella nigrescens CC14M]                                            | 86.8 | 5.50E-70 |
| k141_325767 | 474 | 198930.08  | CP022041 Prevotella melaninogenica strain FDAARGOS_306 chromosome 2, complete sequence    | 99.789 | 0         | KWW24027.1 hypothetical protein F082_2040 [bacterium F082]                                                                | 60   | 2.90E-18 |
| k141_51025  | 427 | 85350.28   | CP016205 Prevotella scopos JCM 17725 strain W2052 chromosome 2 genome                     | 99.766 | 0         | EFC67102.1 LOW QUALITY PROTEIN: hypothetical protein HMPREF0670_02906, partial [Prevotella sp. oral taxon 317 str. F0108] | 77   | 9.10E-32 |
| k141_309125 | 412 | 107878.5   | CP022041 Prevotella melaninogenica strain FDAARGOS_306 chromosome 2, complete sequence    | 98.058 | 0         | CUO89910.1 Uncharacterised protein [Prevotella copri]                                                                     | 91.4 | 1.80E-21 |
| k141_248606 | 411 | 219591     | CP023864 Prevotella jejuni strain CD3:33 chromosome II, complete sequence                 | 100    | 0         | EFN91701.1 hypothetical protein HMPREF9018_1166 [Prevotella amnii CRIS 21A-A]                                             | 95.5 | 3.70E-38 |
| k141_197704 | 409 | 104404.73  | CP023864 Prevotella jejuni strain CD3:33 chromosome II, complete sequence                 | 97.311 | 0         | KWW24027.1 hypothetical protein F082_2040 [bacterium F082]                                                                | 64.6 | 1.30E-11 |
| k141_357441 | 391 | 633828.63  | CP016205 Prevotella scopos JCM 17725 strain W2052 chromosome 2 genome                     | 94.359 | 8.16E-167 | KDS36881.1 hypothetical protein M091_0855 [Parabacteroides distazonis str. 3776 D15 i]                                    | 53.2 | 1.30E-21 |
| k141_228442 | 359 | 151855.46  | LC359097 Uncultured bacterium 81AD08008 gene for 16S rRNA, partial sequence               | 95.822 | 7.48E-162 | CDN41090.1 hypothetical protein BN871_AB_00880 [Paenibacillus sp. P22]                                                    | 67.8 | 1.20E-32 |
| k141_61109  | 353 | 304459.13  | AP018050 Prevotella melaninogenica DNA, complete genome, strain: GAI 07411                | 99.717 | 0         | EDM19151.1 hypothetical protein BACCAC_03785 [Bacteroides caecae ATCC 43185]                                              | 71.3 | 2.60E-24 |
| k141_205250 | 341 | 88773.84   | KF113907 Uncultured Prevotella sp. clone NA37_11 16S ribosomal RNA gene, partial sequence | 97.256 | 1.19E-154 | OXM99333.1 peptide YY, partial [Bifidobacterium vansinderenii]                                                            | 51.5 | 1.20E-13 |
| k141_46210  | 338 | 85072.61   | CP022041 Prevotella melaninogenica strain FDAARGOS_306 chromosome 2, complete sequence    | 99.704 | 1.48E-173 | KWW26465.1 hypothetical protein AUK64_2547 [bacterium P201]                                                               | 73.1 | 5.30E-27 |
| k141_250867 | 334 | 206021.11  | LC356098 Uncultured bacterium 221MH06016 gene for 16S rRNA, partial sequence              | 94.895 | 1.18E-144 | ODU19662.1 hypothetical protein BUN10_26130 [Vibrio parahaemolyticus]                                                     | 80.6 | 4.80E-20 |
| k141_30268  | 326 | 146328.06  | CP019721 Veillonella parvula strain UTDB1-3, complete genome                              | 100    | 1.43E-168 | ETJ17454.1 hypothetical protein Q620_VSAC00705G0001, partial [Veillonella sp. DORA_A_3_16_22]                             | 97.9 | 3.30E-42 |
| k141_154714 | 309 | 183385.02  | CP023864 Prevotella jejuni strain CD3:33 chromosome II, complete sequence                 | 99.029 | 3.84E-154 | EFN91701.1 hypothetical protein HMPREF9018_1166 [Prevotella amnii CRIS 21A-A]                                             | 94.2 | 8.00E-46 |
| k141_304224 | 301 | 99776.09   | CP023863 Prevotella jejuni strain CD3:33 chromosome I, complete sequence                  | 100    | 1.04E-154 | KWW24027.1 hypothetical protein F082_2040 [bacterium F082]                                                                | 66.7 | 7.40E-12 |
| k141_79388  | 296 | 121740.28  | CP022041 Prevotella melaninogenica strain FDAARGOS_306 chromosome 2, complete sequence    | 99.662 | 2.86E-150 | EFC67102.1 LOW QUALITY PROTEIN: hypothetical protein HMPREF0670_02906, partial [Prevotella sp. oral taxon 317 str. F0108] | 84.2 | 3.00E-26 |
| k141_172622 | 290 | 100852.57  | CP023863 Prevotella jejuni strain CD3:33 chromosome I, complete sequence                  | 100    | 1.30E-148 | OPG95628.1 hypothetical protein B2121_25150 [Paenibacillus sp. VT-16-81]                                                  | 72.9 | 7.80E-19 |
| k141_124227 | 287 | 186562.92  | AP018050 Prevotella melaninogenica DNA, complete genome, strain: GAI 07411                | 98.27  | 3.62E-139 | KWW26465.1 hypothetical protein AUK64_2547 [bacterium P201]                                                               | 63.2 | 4.00E-23 |
| k141_235167 | 283 | 144371.6   | LC359516 Uncultured bacterium 83MG1013 gene for 16S rRNA, partial sequence                | 100    | 9.83E-145 | AOE11686.1 hypothetical protein [uncultured bacterium]                                                                    | 77.3 | 1.40E-12 |
| k141_261129 | 274 | 1170229.79 | CP022041 Prevotella melaninogenica strain FDAARGOS_306 chromosome 2, complete sequence    | 100    | 9.55E-140 | CUO90010.1 Uncharacterised protein [Prevotella copri]                                                                     | 96.9 | 6.90E-09 |
| k141_123601 | 273 | 123375.65  | CP022041 Prevotella melaninogenica strain FDAARGOS_306 chromosome 2, complete sequence    | 100    | 3.42E-139 | KWW26465.1 hypothetical protein AUK64_2547 [bacterium P201]                                                               | 61   | 5.90E-16 |
| k141_211996 | 245 | 224901.41  | CP022041 Prevotella melaninogenica strain FDAARGOS_306 chromosome 2, complete sequence    | 98.776 | 1.12E-118 | EF173306.1 cell wall-associated hydrolase [Prevotella bryantii B14]                                                       | 93.8 | 4.30E-26 |
| k141_280265 | 245 | 103339.01  | CP022041 Prevotella melaninogenica strain FDAARGOS_306 chromosome 2, complete sequence    | 92.713 | 1.16E-93  | KWW26465.1 hypothetical protein AUK64_2547 [bacterium P201]                                                               | 61.7 | 1.20E-17 |
| k141_170961 | 241 | 389549.4   | HM322133 Uncultured bacterium clone ncd392h10c1 16S ribosomal RNA gene, partial sequence  | 100    | 1.82E-121 | EDM51784.1 hypothetical protein EUBVEN_00788 [Eubacterium ventriosum ATCC 27560]                                          | 60   | 5.20E-08 |
| k141_10046  | 240 | 497112.72  | CP022041 Prevotella melaninogenica strain FDAARGOS_306 chromosome 2, complete sequence    | 100    | 6.52E-121 | CUO89876.1 Cell wall-associated hydrolase [Prevotella copri]                                                              | 96.2 | 2.00E-36 |
| k141_79577  | 240 | 106402.31  | LC359515 Uncultured bacterium 83MF12012 gene for 16S rRNA, partial sequence               | 100    | 6.52E-121 | ODU19662.1 hypothetical protein BUN10_26130 [Vibrio parahaemolyticus]                                                     | 82.7 | 2.20E-14 |

41 <sup>a</sup> Contig abundance evaluated as the expected read counts by the RSEM program. For a transcript, the RSEM's expected counts may be slightly lower than the raw read  
42 counts due to the reads that map to multiple transcripts were divided among these transcripts.

43

44 **Supplementary Table 2.** The top 80 abundant assembled contigs generated using the Trinity program.

| Contigs                   | Length | Abundance  | Result of blast against Nt database                                                         |              |           | Result of blast against Nr database                                                           |              |          |
|---------------------------|--------|------------|---------------------------------------------------------------------------------------------|--------------|-----------|-----------------------------------------------------------------------------------------------|--------------|----------|
|                           |        |            | Blast hit                                                                                   | Identity (%) | e-value   | Blastx hit                                                                                    | Identity (%) | e-value  |
| yingji_DN483566_c8_g3_i1  | 11760  | 33252      | MG772933Bat SARS-like coronavirus isolate bat-SL-CoVZC45, complete genome                   | 90.415       | 0         | AVP78030.1 non-structural polyprotein 1ab [Bat SARS-like coronavirus]                         | 97.3         | 0        |
| yingji_DN483576_c40_g3_i4 | 2115   | 957405.85  | CP022041Prevotella melaninogenica strain FDAARGOS_306 chromosome 2, complete sequence       | 90.297       | 0         | CDB46314.1 putative uncharacterized protein [Phascolarctobacterium sp. CAG:207]               | 79.5         | 7.90E-84 |
| yingji_DN483576_c40_g3_i2 | 1923   | 2094180.66 | CP023863 Prevotella jejunii strain CD3:33 chromosome I, complete sequence                   | 97.558       | 0         | ETD26335.1 hypothetical protein HMPREF1173_02303 [Prevotella nigrescens CCI14M]               | 90.1         | 8.80E-66 |
| yingji_DN482282_c7_g3_i1  | 1426   | 1508548.65 | LT906445Veillonella parvula strain NCTC11810 genome assembly, chromosome: 1                 | 99.79        | 0         | ETJ17454.1 hypothetical protein Q620_VSAC00705G0001, partial [Veillonella sp. DORA_A_3_16_22] | 94.9         | 4.10E-76 |
| yingji_DN483576_c40_g1_i5 | 1227   | 747406.46  | AP018050Prevotella melaninogenica DNA, complete genome, strain: GAI 07411                   | 94.652       | 0         | KWW26465.1 hypothetical protein AUK64_2547 [bacterium P201]                                   | 66.7         | 1.30E-25 |
| yingji_DN482627_c4_g1_i6  | 848    | 32710.61   | CP012072Actinomyces meyeri strain W712, complete genome                                     | 89.711       | 0         | KMS64810.1 hypothetical protein BVRB_042430, partial [Beta vulgaris subsp. vulgaris]          | 63.6         | 1.30E-24 |
| yingji_DN483576_c40_g2_i4 | 794    | 85025.94   | JQ460268Uncultured bacterium clone 070054_517 16S ribosomal RNA gene, partial sequence      | 96.343       | 0         | EDP22130.1 hypothetical protein FAEPRAM212_01166 [Faecalibacterium prausnitzii M21/2]         | 66.9         | 2.40E-49 |
| yingji_DN483576_c40_g2_i1 | 793    | 353112.99  | GQ131418Prevotella veroralis strain F0319 16S ribosomal RNA gene, partial sequence          | 98.907       | 0         | EDM19152.1 hypothetical protein BACCAC_03786 [Bacteroides caccae ATCC 43185]                  | 78.6         | 7.80E-53 |
| yingji_DN474678_c1_g1_i10 | 641    | 58815.68   | JQ478347Uncultured bacterium clone 071076_162 16S ribosomal RNA gene, partial sequence      | 94.543       | 0         | KFJ04251.1 PG1 protein [Bifidobacterium thermacidophilum subsp. thermacidophilum]             | 50.8         | 1.70E-18 |
| yingji_DN475086_c3_g1_i12 | 601    | 134057.33  | CP023864Prevotella jejunii strain CD3:33 chromosome II, complete sequence                   | 96.179       | 0         | KWW24027.1 hypothetical protein F082_2040 [bacterium F082]                                    | 60.9         | 2.10E-26 |
| yingji_DN478175_c2_g1_i2  | 571    | 42741.6    | CP016205Prevotella scopos JCM 17725 strain W2052 chromosome 2 genome                        | 90.698       | 0         | KWW26465.1 hypothetical protein AUK64_2547 [bacterium P201]                                   | 75           | 8.70E-30 |
| yingji_DN481434_c1_g1_i7  | 562    | 31243.87   | CP012072Actinomyces meyeri strain W712, complete genome                                     | 92.568       | 1.19E-176 | EDX25829.1 conserved hypothetical protein [Streptomyces sp. Mg1]                              | 53.1         | 1.50E-26 |
| yingji_DN474690_c4_g1_i4  | 556    | 192919.06  | CP002589Prevotella denticola F0289, complete genome                                         | 90.991       | 0         | KWW26465.1 hypothetical protein AUK64_2547 [bacterium P201]                                   | 63.8         | 3.10E-32 |
| yingji_DN483576_c40_g2_i2 | 518    | 129481.81  | KP294789Uncultured Veillonella sp. clone P17-29-T7 16S ribosomal RNA gene, partial sequence | 95.402       | 0         | EDP22130.1 hypothetical protein FAEPRAM212_01166 [Faecalibacterium prausnitzii M21/2]         | 78.4         | 5.30E-50 |
| yingji_DN479926_c1_g1_i1  | 496    | 40272.89   | FM997688Uncultured bacterium partial 16S rRNA gene, clone 16sps27-5a05.w2k                  | 95.749       | 0         | OPG95628.1 hypothetical protein B2I21_25150 [Paenibacillus sp. VT-16-81]                      | 58.1         | 1.40E-12 |
| yingji_DN475296_c6_g1_i2  | 476    | 75075.24   | AM420082Uncultured Prevotella sp. partial 16S rRNA gene, clone 302B04(oral)                 | 96.603       | 0         | AOE06246.1 hypothetical protein [uncultured bacterium]                                        | 62.9         | 7.80E-24 |
| yingji_DN482529_c2_g1_i1  | 473    | 39126.62   | CP022041Prevotella melaninogenica strain FDAARGOS_306 chromosome 2, complete sequence       | 93.137       | 1.00E-166 | EFN91701.1 hypothetical protein HMPREF9018_1166 [Prevotella amnii CRIS 21A-A]                 | 83.7         | 4.10E-33 |
| yingji_DN477344_c32_g1_i7 | 424    | 128501.09  | CP023863Prevotella jejunii strain CD3:33 chromosome I, complete sequence                    | 97.866       | 2.51E-157 | AOE06246.1 hypothetical protein [uncultured bacterium]                                        | 61.3         | 2.00E-23 |
| yingji_DN475296_c6_g1_i10 | 414    | 76992.72   | JQ448356Uncultured bacterium clone 069077_255 16S ribosomal RNA gene, partial sequence      | 95.844       | 0         | AOE06246.1 hypothetical protein [uncultured bacterium]                                        | 60           | 2.70E-20 |
| yingji_DN477344_c32_g1_i1 | 412    | 117747.68  | FJ557623Uncultured bacterium clone ET_F_2c09 16S ribosomal RNA gene, partial sequence       | 98.403       | 6.82E-153 | AOE06246.1 hypothetical protein [uncultured bacterium]                                        | 60.7         | 4.40E-23 |
| yingji_DN482282_c7_g1_i2  | 405    | 48841.63   | CP019721Veillonella parvula strain UTDB1-3, complete genome                                 | 98.765       | 0         | CUP36263.1 Uncharacterised protein [Bacteroides xylanisolvens]                                | 63           | 1.30E-16 |
| yingji_DN477344_c31_g1_i2 | 388    | 61080.74   | LT679278Prevotella melaninogenica partial 16S rRNA gene, isolate 43T_4692                   | 96.392       | 1.32E-179 | OPG95628.1 hypothetical protein B2I21_25150 [Paenibacillus sp. VT-16-81]                      | 59           | 2.60E-17 |

|                           |     |           |                                                                                          |        |           |                                                                                                                           |      |          |
|---------------------------|-----|-----------|------------------------------------------------------------------------------------------|--------|-----------|---------------------------------------------------------------------------------------------------------------------------|------|----------|
| yingji_DN483576_c39_g1_i2 | 384 | 48687.59  | CP023863Prevotella jejunii strain CD3:33 chromosome I, complete sequence                 | 94.531 | 1.03E-165 | KWW26465.1 hypothetical protein AUK64_2547 [bacterium P201]                                                               | 56.8 | 8.20E-24 |
| yingji_DN483239_c4_g4_i1  | 379 | 80255.5   | CP023864Prevotella jejunii strain CD3:33 chromosome II, complete sequence                | 96.477 | 1.01E-170 | EFN91701.1 hypothetical protein HMPREF9018_1166 [Prevotella amnii CRIS 21A-A]                                             | 87.9 | 5.60E-49 |
| yingji_DN481203_c1_g1_i19 | 379 | 30484.35  | CP022041Prevotella melaninogenica strain FDAARGOS_306 chromosome 2, complete sequence    | 97.098 | 1.29E-179 | KWW26465.1 hypothetical protein AUK64_2547 [bacterium P201]                                                               | 66.2 | 5.10E-18 |
| yingji_DN479496_c2_g1_i1  | 373 | 46219.95  | JN382502Uncultured bacterium clone ZB1881012 16S ribosomal RNA gene, partial sequence    | 96.196 | 5.99E-168 | AOE11686.1 hypothetical protein [uncultured bacterium]                                                                    | 68.2 | 1.20E-19 |
| yingji_DN477344_c32_g2_i4 | 371 | 54773.47  | GQ365015Uncultured bacterium clone 89BAL_G12 16S ribosomal RNA gene, partial sequence    | 98.638 | 0         | EDO51672.1 hypothetical protein BACUNI_04219 [Bacteroides uniformis ATCC 8492]                                            | 71.3 | 1.80E-23 |
| yingji_DN481441_c5_g1_i8  | 369 | 32150.86  | CP016205Prevotella scopos JCM 17725 strain W2052 chromosome 2 genome                     | 97.561 | 2.10E-177 | KWW26465.1 hypothetical protein AUK64_2547 [bacterium P201]                                                               | 71   | 6.50E-26 |
| yingji_DN474678_c1_g1_i3  | 366 | 57874.08  | LT677940Prevotella melaninogenica partial 16S rRNA gene, isolate 219N_3354               | 98.361 | 0         | OPG95628.1 hypothetical protein B2121_25150 [Paenibacillus sp. VT-16-81]                                                  | 68   | 3.40E-19 |
| yingji_DN474759_c0_g1_i1  | 355 | 179075.38 | CP022040Prevotella melaninogenica strain FDAARGOS_306 chromosome 1, complete sequence    | 96.275 | 1.24E-159 | AOE06246.1 hypothetical protein [uncultured bacterium]                                                                    | 57.9 | 1.10E-19 |
| yingji_DN482113_c2_g1_i4  | 354 | 37700.68  | CP019721Veillonella parvula strain UTDB1-3, complete genome                              | 98.58  | 1.21E-174 | EFG22293.1 hypothetical protein HMPREF0873_01746, partial [Veillonella sp. 3_1_44]                                        | 97.7 | 2.40E-14 |
| yingji_DN482732_c3_g1_i1  | 353 | 224701.56 | CP023864Prevotella jejunii strain CD3:33 chromosome II, complete sequence                | 97.209 | 2.89E-96  | ETD26335.1 hypothetical protein HMPREF1173_02303 [Prevotella nigrescens CC14M]                                            | 90.3 | 7.50E-24 |
| yingji_DN476965_c6_g1_i1  | 344 | 30550.91  | CP024735Prevotella intermedia strain KCOM 1944 chromosome 2, complete sequence           | 94.671 | 2.66E-136 | KWW26465.1 hypothetical protein AUK64_2547 [bacterium P201]                                                               | 82.1 | 1.70E-17 |
| yingji_DN481203_c1_g1_i8  | 330 | 119489.42 | CP023863Prevotella jejunii strain CD3:33 chromosome I, complete sequence                 | 97.77  | 7.16E-127 | EFC67102.1 LOW QUALITY PROTEIN: hypothetical protein HMPREF0670_02906, partial [Prevotella sp. oral taxon 317 str. F0108] | 75   | 3.90E-30 |
| yingji_DN481794_c4_g2_i1  | 329 | 150920.78 | LC356755Uncultured bacterium 23MH11015 gene for 16S rRNA, partial sequence               | 96.285 | 6.93E-147 | OUD19662.1 hypothetical protein BUN10_26130 [Vibrio parahaemolyticus]                                                     | 80.3 | 5.00E-22 |
| yingji_DN469226_c0_g1_i1  | 325 | 34281.13  | CP023863Prevotella jejunii strain CD3:33 chromosome I, complete sequence                 | 94.044 | 5.40E-133 | AOE06246.1 hypothetical protein [uncultured bacterium]                                                                    | 55.2 | 7.40E-18 |
| yingji_DN483275_c3_g1_i23 | 321 | 64351.2   | CP023864Prevotella jejunii strain CD3:33 chromosome II, complete sequence                | 95.912 | 1.89E-142 | EFN91701.1 hypothetical protein HMPREF9018_1166 [Prevotella amnii CRIS 21A-A]                                             | 85.9 | 2.80E-33 |
| yingji_DN480761_c4_g1_i2  | 315 | 287176.88 | DQ537679Uncultured bacterium clone B288-74 16S ribosomal RNA gene, partial sequence      | 97.444 | 5.11E-148 | OPG95628.1 hypothetical protein B2121_25150 [Paenibacillus sp. VT-16-81]                                                  | 69.5 | 4.50E-12 |
| yingji_DN474690_c4_g1_i8  | 314 | 90964.48  | CP016205Prevotella scopos JCM 17725 strain W2052 chromosome 2 genome                     | 92.089 | 1.14E-119 | KWW26465.1 hypothetical protein AUK64_2547 [bacterium P201]                                                               | 60.4 | 6.30E-22 |
| yingji_DN470028_c1_g1_i1  | 314 | 58418.12  | JQ470050Uncultured bacterium clone 071024_066 16S ribosomal RNA gene, partial sequence   | 93.98  | 1.47E-123 | EXT36960.1 hypothetical protein J810_4084, partial [Acinetobacter sp. 25977_7]                                            | 66.1 | 1.00E-08 |
| yingji_DN480267_c2_g1_i2  | 308 | 73945.05  | JQ471950Uncultured bacterium clone 071054_096 16S ribosomal RNA gene, partial sequence   | 96.644 | 2.35E-136 | OUD19662.1 hypothetical protein BUN10_26130 [Vibrio parahaemolyticus]                                                     | 82.4 | 2.10E-14 |
| yingji_DN481203_c1_g1_i12 | 306 | 43194.56  | CP022041Prevotella melaninogenica strain FDAARGOS_306 chromosome 2, complete sequence    | 97.712 | 8.27E-146 | EFC67102.1 LOW QUALITY PROTEIN: hypothetical protein HMPREF0670_02906, partial [Prevotella sp. oral taxon 317 str. F0108] | 80.9 | 1.00E-21 |
| yingji_DN482535_c5_g1_i14 | 299 | 107128.47 | JF123172Uncultured bacterium clone ncd1418b06c1 16S ribosomal RNA gene, partial sequence | 99.663 | 8.03E-151 | ABZ84906.1 hypothetical protein HM1_3148 [Heliobacterium modesticaldum Ice1]                                              | 77.3 | 2.10E-27 |
| yingji_DN482282_c7_g1_i5  | 295 | 55295.31  | CP019721Veillonella parvula strain UTDB1-3, complete genome                              | 97.288 | 4.83E-138 | ABZ84885.1 hypothetical protein HM1_3125 [Heliobacterium modesticaldum Ice1]                                              | 54.2 | 7.70E-06 |
| yingji_DN483576_c40_g3_i9 | 293 | 45171.15  | CP003667Prevotella sp. oral taxon 299 str. F0039 plasmid, complete sequence              | 99.317 | 6.11E-147 | EFN91701.1 hypothetical protein HMPREF9018_1166 [Prevotella amnii CRIS 21A-A]                                             | 96.9 | 3.10E-47 |
| yingji_DN482458_c5_g1_i11 | 292 | 67762.99  | CP022041Prevotella melaninogenica strain FDAARGOS_306 chromosome 2, complete sequence    | 95.848 | 4.84E-128 | ETD26335.1 hypothetical protein HMPREF1173_02303 [Prevotella nigrescens CC14M]                                            | 86.7 | 1.30E-18 |
| yingji_DN483110_c4_g1_i5  | 279 | 33609.11  | AP018050Prevotella melaninogenica DNA, complete genome, strain: GAI 07411                | 94.203 | 4.70E-113 | KDS36881.1 hypothetical protein M091_0855 [Parabacteroides distasonis str. 3776 D15 i]                                    | 67.1 | 1.80E-20 |
| yingji_DN481323_c5_g2_i2  | 278 | 74663.27  | CP023863Prevotella jejunii strain CD3:33 chromosome I, complete sequence                 | 91.786 | 1.32E-103 | KWW26465.1 hypothetical protein AUK64_2547 [bacterium P201]                                                               | 56   | 9.80E-19 |



|                           |     |           |                                                                                                  |        |           |                                                                                                                           |      |          |
|---------------------------|-----|-----------|--------------------------------------------------------------------------------------------------|--------|-----------|---------------------------------------------------------------------------------------------------------------------------|------|----------|
| yingji_DN482458_c5_g1_i13 | 275 | 343055.19 | AP018050Prevotella melaninogenica DNA, complete genome, strain: GAI 07411                        | 94.224 | 1.28E-113 | ETD26335.1 hypothetical protein HMPREF1173_02303 [Prevotella nigrescens CC14M]                                            | 89.1 | 1.80E-25 |
| yingji_DN476234_c3_g1_i1  | 269 | 46071.94  | LC356684Uncultured bacterium 23MB01003 gene for 16S rRNA, partial sequence                       | 95.911 | 1.24E-118 | OUD19662.1 hypothetical protein BUN10_26130 [Vibrio parahaemolyticus]                                                     | 74.3 | 4.20E-19 |
| yingji_DN479388_c0_g1_i2  | 265 | 88879.77  | LC358495Uncultured bacterium 62MG02014 gene for 16S rRNA, partial sequence                       | 95.802 | 9.52E-115 | OUD19662.1 hypothetical protein BUN10_26130 [Vibrio parahaemolyticus]                                                     | 77.1 | 1.60E-18 |
| yingji_DN479135_c8_g1_i2  | 264 | 70245.75  | CP022041Prevotella melaninogenica strain FDAARGOS_306 chromosome 2, complete sequence            | 98.333 | 8.04E-51  | CUO90010.1 Uncharacterised protein [Prevotella copri]                                                                     | 93.8 | 5.70E-08 |
| yingji_DN477344_c32_g1_i4 | 261 | 247610.82 | FJ557623Uncultured bacterium clone ET_F_2c09 16S ribosomal RNA gene, partial sequence            | 98.462 | 2.57E-125 | AOE06246.1 hypothetical protein [uncultured bacterium]                                                                    | 60.9 | 1.10E-14 |
| yingji_DN480509_c0_g1_i1  | 257 | 72308.97  | LT684910Uncultured Prevotella sp. partial 16S rRNA gene, isolate W787N_10325                     | 96.996 | 2.59E-105 | OUD19662.1 hypothetical protein BUN10_26130 [Vibrio parahaemolyticus]                                                     | 73.4 | 8.50E-17 |
| yingji_DN479682_c3_g1_i23 | 253 | 145114.61 | KY386203Uncultured Prevotella sp. clone FAA299 16S ribosomal RNA gene, partial sequence          | 98.814 | 4.14E-123 | OUD19662.1 hypothetical protein BUN10_26130 [Vibrio parahaemolyticus]                                                     | 78.8 | 3.10E-19 |
| yingji_DN477344_c32_g3_i1 | 251 | 54781.57  | LT688914Prevotella nanciensis partial 16S rRNA gene, isolate W840T_14330                         | 97.61  | 5.35E-117 | EXY63944.1 hypothetical protein M085_3631 [Bacteroides fragilis str. 3986 N(B)19]                                         | 60.9 | 9.80E-10 |
| yingji_DN481203_c1_g1_i21 | 248 | 45956.1   | CP023864Prevotella jejunii strain CD3:33 chromosome II, complete sequence                        | 97.177 | 1.14E-113 | EFC67102.1 LOW QUALITY PROTEIN: hypothetical protein HMPREF0670_02906, partial [Prevotella sp. oral taxon 317 str. F0108] | 82.4 | 2.90E-22 |
| yingji_DN482458_c5_g1_i7  | 248 | 41176.22  | CP022041Prevotella melaninogenica strain FDAARGOS_306 chromosome 2, complete sequence            | 98.367 | 5.27E-117 | EDY97039.1 hypothetical protein BACPLE_00421 [Bacteroides plebeius DSM 17135]                                             | 80.3 | 2.60E-23 |
| yingji_DN474567_c2_g4_i1  | 242 | 142374.1  | CP023863Prevotella jejunii strain CD3:33 chromosome I, complete sequence                         | 95.816 | 1.13E-103 | KDS36881.1 hypothetical protein M091_0855 [Parabacteroides distasonis str. 3776 D15 i]                                    | 67.6 | 2.20E-14 |
| yingji_DN483110_c4_g1_i10 | 240 | 35521.85  | EU063557Uncultured bacterium clone LM0ACA28ZD06FM1 genomic sequence                              | 86.364 | 1.18E-63  | EFU29156.1 hypothetical protein HMPREF6485_2897, partial [Prevotella buccae ATCC 33574]                                   | 48.5 | 4.20E-10 |
| yingji_DN482535_c5_g1_i4  | 237 | 106872.4  | LT906445Veillonella parvula strain NCTC11810 genome assembly, chromosome: 1                      | 100    | 4.15E-68  | CRE39519.1 transposase for IS1272 [Staphylococcus aureus]                                                                 | 70.6 | 1.40E-10 |
| yingji_DN477344_c32_g2_i2 | 235 | 196262.23 | KY386203Uncultured Prevotella sp. clone FAA299 16S ribosomal RNA gene, partial sequence          | 99.574 | 1.78E-116 | OUD19662.1 hypothetical protein BUN10_26130 [Vibrio parahaemolyticus]                                                     | 83.3 | 1.80E-18 |
| yingji_DN481253_c3_g1_i4  | 234 | 281063.31 | LT678906Prevotella melaninogenica partial 16S rRNA gene, isolate W538N_4320                      | 99.134 | 1.38E-112 | OPG95628.1 hypothetical protein B2I21_25150 [Paenibacillus sp. VT-16-81]                                                  | 72   | 9.20E-10 |
| yingji_DN477344_c32_g3_i2 | 234 | 147867.65 | LT677940Prevotella melaninogenica partial 16S rRNA gene, isolate 219N_3354                       | 97.436 | 1.39E-107 | KMV77917.1 hypothetical protein HMPREF0979_01154, partial [Coprobacillus sp. 8_1_38FAA]                                   | 75.7 | 5.60E-07 |
| yingji_DN483048_c4_g1_i4  | 233 | 49367.6   | CP022041Prevotella melaninogenica strain FDAARGOS_306 chromosome 2, complete sequence            | 96.957 | 1.08E-103 | KWW25567.1 Uncharacterized protein AUK64_2610, partial [bacterium P201]                                                   | 84.8 | 3.90E-13 |
| yingji_DN482496_c5_g1_i9  | 230 | 147449.2  | CP023864Prevotella jejunii strain CD3:33 chromosome II, complete sequence                        | 99.558 | 1.75E-111 | EFN91701.1 hypothetical protein HMPREF9018_1166 [Prevotella amnii CRIS 21A-A]                                             | 96   | 1.40E-31 |
| yingji_DN477518_c5_g2_i5  | 227 | 117518.07 | CP023863Prevotella jejunii strain CD3:33 chromosome I, complete sequence                         | 96.847 | 2.93E-99  | AOE11741.1 hypothetical protein [uncultured bacterium]                                                                    | 67.2 | 1.30E-13 |
| yingji_DN478259_c6_g1_i2  | 227 | 96776.77  | CP023863Prevotella jejunii strain CD3:33 chromosome I, complete sequence                         | 94.416 | 1.40E-77  | CUO90010.1 Uncharacterised protein [Prevotella copri]                                                                     | 90.6 | 4.10E-07 |
| yingji_DN482113_c3_g1_i2  | 222 | 155319.78 | KF113907Uncultured Prevotella sp. clone NA37_11 16S ribosomal RNA gene, partial sequence         | 97.748 | 1.32E-102 | EXT36960.1 hypothetical protein J810_4084, partial [Acinetobacter sp. 25977_7]                                            | 73.2 | 1.30E-13 |
| yingji_DN482113_c3_g1_i10 | 222 | 117885.78 | GQ398420Uncultured bacterium clone 47 16S ribosomal RNA gene, partial sequence                   | 97.596 | 7.98E-95  | EXT36960.1 hypothetical protein J810_4084, partial [Acinetobacter sp. 25977_7]                                            | 66.1 | 8.70E-10 |
| yingji_DN479926_c4_g1_i4  | 222 | 70429.24  | MH078430Uncultured Capnocytophaga sp. clone 174_p8_c_25 16S ribosomal RNA gene, partial sequence | 98.013 | 1.79E-66  | AOE12499.1 hypothetical protein [uncultured bacterium]                                                                    | 68   | 3.40E-06 |
| yingji_DN482535_c5_g1_i5  | 220 | 85474.58  | DQ394709Veillonella parvula strain H2 16S ribosomal RNA gene, partial sequence                   | 99.091 | 1.67E-106 | CDN41090.1 hypothetical protein BN871_AB_00880 [Paenibacillus sp. P22]                                                    | 67.1 | 3.10E-15 |
| yingji_DN477344_c32_g1_i6 | 217 | 355553.84 | CP022040Prevotella melaninogenica strain FDAARGOS_306 chromosome 1, complete sequence            | 99.539 | 1.65E-106 | EHG15578.1 hypothetical protein HMPREF9138_01799, partial [Prevotella histicola F0411]                                    | 97.8 | 6.10E-16 |

|                           |     |          |                                                                                            |        |          |                                                                             |      |          |
|---------------------------|-----|----------|--------------------------------------------------------------------------------------------|--------|----------|-----------------------------------------------------------------------------|------|----------|
| yingji_DN482535_c5_g1_i2  | 214 | 33075.64 | JQ457132Uncultured bacterium clone 070007_385 16S ribosomal RNA gene, partial sequence     | 98.095 | 1.27E-97 | OBZ15173.1 hypothetical protein A7975_32355 [Bacillus sp. FJAT-26390]       | 73.3 | 8.60E-15 |
| yingji_DN474678_c1_g1_i1  | 211 | 33410.85 | LT677940Prevotella melaninogenica partial 16S rRNA gene, isolate 219N_3354                 | 97.63  | 1.62E-96 | AOE06246.1 hypothetical protein [uncultured bacterium]                      | 50.7 | 1.90E-06 |
| yingji_DN480267_c2_g1_i4  | 210 | 75430.95 | JQ077772Uncultured bacterium clone HAV7D9G02BX98V 16S ribosomal RNA gene, partial sequence | 99.383 | 5.94E-76 | OUD19662.1 hypothetical protein BUN10_26130 [Vibrio parahaemolyticus]       | 82.4 | 1.50E-14 |
| yingji_DN483576_c40_g3_i3 | 208 | 38527.64 | CP023864Prevotella jejuni strain CD3:33 chromosome II, complete sequence                   | 98.558 | 3.41E-98 | CUO89876.1 Cell wall-associated hydrolase [Prevotella copri]                | 95.7 | 7.80E-29 |
| yingji_DN480761_c4_g1_i1  | 205 | 51418.06 | LT688896Prevotella melaninogenica partial 16S rRNA gene, isolate W840T_14312               | 97.537 | 4.37E-92 | OPG95628.1 hypothetical protein B2121_25150 [Paenibacillus sp. VT-16-81]    | 63.9 | 9.50E-11 |
| yingji_DN480296_c1_g4_i1  | 202 | 33474.87 | CP003667Prevotella sp. oral taxon 299 str. F0039 plasmid, complete sequence                | 97.525 | 1.54E-91 | EDO14276.1 hypothetical protein BACOVA_00014 [Bacteroides ovatus ATCC 8483] | 57.6 | 2.30E-09 |
| yingji_DN477344_c33_g1_i6 | 201 | 58581.35 | EU993256Uncultured bacterium clone WG_e55 16S ribosomal RNA gene, partial sequence         | 95.522 | 2.59E-84 |                                                                             |      |          |

45 <sup>a</sup> Contig abundance was evaluated as the expected read counts by the RSEM program. For a transcript, the RSEM's expected count may be slightly lower than the raw read  
46 count due to the reads that map to multiple transcripts were divided among these transcripts.

47 **Supplementary Table 3.** Amino acid identities of the selected predicted gene products between the novel coronavirus (WHCV) and known  
 48 betacoronaviruses.

| CoV                 | Strains          | Amino acid identity (%) |      |      |      |      |      |      |      |      |       |       |       |       |       |       |       |      |      |      |      |      |      |
|---------------------|------------------|-------------------------|------|------|------|------|------|------|------|------|-------|-------|-------|-------|-------|-------|-------|------|------|------|------|------|------|
|                     |                  | nsp1                    | nsp2 | nsp3 | nsp4 | nsp5 | nsp6 | nsp7 | nsp8 | nsp9 | nsp10 | nsp11 | nsp12 | nsp13 | nsp14 | nsp15 | nsp16 | S    | ORF3 | E    | M    | ORF8 | N    |
| <i>Sarbecovirus</i> | Bat-SL-CoVZC45   | 84.4                    | 95.3 | 94.4 | 96.8 | 99.0 | 97.9 | 100  | 97.5 | 97.3 | 97.1  | 85.7  | 95.9  | 99.3  | 94.5  | 89.0  | 98.0  | 82.3 | 90.9 | 100  | 98.7 | 94.3 | 94.0 |
|                     | SARS-CoV Tor2    | 95.6                    | 68.3 | 77.3 | 79.9 | 51.2 | 87.2 | 98.8 | 97.5 | 97.3 | 97.1  | 85.7  | 96.3  | 99.8  | 95.1  | 88.7  | 93.3  | 77.2 | 72.7 | 96.1 | 91.0 | 28.0 | 91.0 |
|                     | BM48-31/BGR/2008 | 81.7                    | 62.5 | 72.9 | 81.1 | 94.1 | 83.8 | 95.2 | 96.5 | 98.2 | 94.3  | 78.6  | 95.4  | 97.8  | 93.5  | 89.9  | 88.6  | 73.2 | 63.6 | 93.4 | 87.9 | /    | 88.2 |
|                     | WIV1             | 85.0                    | 67.3 | 77.0 | 80.3 | 95.8 | 86.9 | 100  | 97.5 | 97.3 | 97.9  | 85.7  | 96.4  | 99.5  | 95.4  | 89.0  | 93.0  | 78.3 | 74.5 | 96.1 | 90.1 | 58.2 | 91.0 |
|                     | JTMC15           | 78.9                    | 68.9 | 76.0 | 81.3 | 94.8 | 85.9 | 98.8 | 96.5 | 97.3 | 97.1  | 85.7  | 96.4  | 98.5  | 94.9  | 88.2  | 92.6  | 74.3 | 68.4 | 92.1 | 90.5 | /    | 90.0 |
| <i>Merbecovirus</i> | EriCoV           | 16.5                    | 18.6 | 30.1 | 42.4 | 49.2 | 34.6 | 60.2 | 52.8 | 50.0 | 60.7  | 46.2  | 71.3  | 71.1  | 63.6  | 50.0  | 65.8  | 29.3 | /    | 40.8 | 43.1 | /    | 46.8 |
|                     | Ty-BatCoV-HKU4   | 17.0                    | 17.5 | 30.6 | 37.2 | 68.6 | 34.9 | 54.2 | 50.8 | 51.8 | 59.0  | 53.8  | 70.8  | 70.9  | 63.0  | 50.9  | 65.4  | 31.7 | /    | 40.8 | 42.0 | /    | 47.0 |
|                     | MERS-CoV         | 16.6                    | 18.3 | 30.1 | 39.2 | 50.8 | 33.9 | 55.4 | 52.8 | 53.6 | 58.6  | 46.2  | 71.3  | 71.6  | 63.6  | 50.9  | 66.1  | 27.4 | /    | 35.5 | 40.6 | /    | 47.0 |
|                     | Pi-BatCoV_HKU5   | 17.5                    | 18.1 | 30.6 | 39.8 | 52.3 | 34.3 | 56.6 | 51.3 | 48.2 | 56.1  | 46.2  | 71.6  | 71.7  | 62.8  | 51.5  | 65.4  | 27.5 | /    | 32.9 | 41.6 | /    | 45.2 |
| <i>Nobecovirus</i>  | Ro-BatCoV_GCCDC1 | 24.1                    | 16.2 | 29.4 | 40.9 | 52.0 | 36.2 | 66.3 | 57.6 | 55.4 | 62.9  | 38.5  | 72.3  | 73.7  | 61.6  | 49.7  | 63.5  | 32.1 | /    | 32.4 | 43.4 | /    | 39.7 |
|                     | Ro-BatCoV_HKU9   | 26.4                    | 19.1 | 30.4 | 43.1 | 50.2 | 33.6 | 67.5 | 57.6 | 58   | 65.0  | 38.5  | 72.6  | 74.0  | 61.2  | 47.5  | 62.3  | 31.4 | /    | 28.4 | 39.6 | /    | 41.5 |
| <i>Hibecovirus</i>  | Bat_Hp-BetaCoV   | 23.8                    | 27.0 | 38.6 | 53.8 | 49.2 | 44.8 | 72.3 | 60.1 | 61.6 | 68.6  | 69.2  | 77.5  | 80.7  | 70.2  | 61.6  | 67.8  | 42.8 | /    | 53.9 | 52.5 | /    | 50.1 |
| <i>Embecovirus</i>  | HCoV_HKU1        | 12.7                    | 11.8 | 22.2 | 41.3 | 47.9 | 28.5 | 47.0 | 46.6 | 46.4 | 52.6  | 61.5  | 67.0  | 65.3  | 58.3  | 49.1  | 63.4  | 27.4 | /    | 28.4 | 36.4 | /    | 31.6 |
|                     | HCoV_OC43        | 15.2                    | 10.8 | 22.8 | 41.5 | 50.8 | 28.5 | 49.4 | 47.4 | 46.4 | 51.8  | 61.5  | 65.4  | 67.9  | 58.0  | 47.6  | 66.1  | 28.4 | /    | 22.4 | 40.1 | /    | 32.0 |
|                     | ChRCoV_HKU24     | 16.5                    | 11.3 | 22.3 | 40.4 | 99.0 | 29.9 | 48.2 | 46.4 | 44.5 | 54.0  | 61.5  | 67.0  | 68.8  | 59.2  | 48.8  | 65.1  | 27.8 | /    | 25.0 | 37.2 | /    | 31.1 |
|                     | MHV              | 17.4                    | 10.3 | 23.0 | 41.1 | 50.2 | 28.5 | 44.6 | 47.1 | 48.2 | 52.6  | 61.5  | 65.8  | 67.3  | 58.1  | 48.2  | 63.1  | 28.1 | /    | 25.0 | 39.2 | /    | 32.4 |

49 **Supplementary Table 4.** Predicted cleavage products of the replicase polyproteins of  
 50 WHCV.

| <b>Cleavage product</b> | <b>Position in polyprotein pp1a/pp1ab<sup>a</sup></b> | <b>Protein size (no. of amino acids)</b> | <b>Putative functional domain(s)<sup>b</sup></b> |
|-------------------------|-------------------------------------------------------|------------------------------------------|--------------------------------------------------|
| nsp1                    | 1Met-Gly180                                           | 180                                      |                                                  |
| nsp2                    | 181Ala-Gly818                                         | 638                                      |                                                  |
| nsp3                    | 819Ala-Gly2763                                        | 1945                                     | ADRP                                             |
| nsp4                    | 2764Lys-Gln3263                                       | 500                                      |                                                  |
| nsp5                    | 3264Ser-Gln3569                                       | 306                                      | 3CLpro                                           |
| nsp6                    | 3570Ser-Gln3859                                       | 290                                      |                                                  |
| nsp7                    | 3860Ser-Gln3942                                       | 83                                       |                                                  |
| nsp8                    | 3943Ala-Gln4140                                       | 198                                      |                                                  |
| nsp9                    | 4141Asn-Gln4253                                       | 113                                      |                                                  |
| nsp10                   | 4254Ala-Gln4392                                       | 139                                      |                                                  |
| nsp11                   | 4393Ser-Val4405                                       | 13                                       |                                                  |
| nsp12                   | 4393Ser-Gln5324                                       | 932                                      | RdRp                                             |
| nsp13                   | 5325Ala-Gln5925                                       | 601                                      | Hel                                              |
| nsp14                   | 5926Ala-Gln6452                                       | 527                                      | ExoN                                             |
| nsp15                   | 6453Ser-Gln6798                                       | 346                                      | NendoU                                           |
| nsp16                   | 6799Ser-Asn7096                                       | 298                                      | O-MT                                             |

51 <sup>a</sup>Amino acids of replicase proteins pp1a and pp1ab were numbered with the assumption that a -1 ribosomal  
 52 frameshift occurs to express ORF1b, and use of the slippery sequence UUUAAAC is predicted to yield a peptide  
 53 bond between Asn4401 and Arg4402 in pp1ab.

54 <sup>b</sup>Abbreviations: ADRP, adenosine diphosphate-ribose 1''-phosphatase; 3CLpro, 3C-like cysteine proteinase;  
 55 RdRp, RNA-dependent RNA polymerase; Hel, helicase; ExoN, 3'-to-5' exonuclease; NendoU, nidoviral  
 56 endoribonuclease specific for U; OMT, S-adenosylmethionine-dependent ribose 2'-O-methyltransferase.

57 **Supplementary Table 5.** Predicted gene functions of WHCV ORFs.

| <b>ORF name</b> | <b>Proposed function</b>                                                                                                          |
|-----------------|-----------------------------------------------------------------------------------------------------------------------------------|
| ORF 1a          | Encoded nonstructural proteins (nsp1 to nsp11), essential for viral replication, viral assembly, immune response modulation, etc. |
| ORF 1b          | Encoded nonstructural proteins (nsp12 to nsp16), essential for viral replication                                                  |
| S               | Spike protein, binding to cell receptor and mediate virus-cell fusion                                                             |
| ORF 3a          | Accessory protein                                                                                                                 |
| ORF 3b          | Accessory protein                                                                                                                 |
| E               | Envelope protein, virus assembly and morphogenesis                                                                                |
| M               | Membrane protein, virus assembly                                                                                                  |
| ORF6            | Accessory protein                                                                                                                 |
| ORF 7a          | Accessory protein                                                                                                                 |
| ORF 7b          | Accessory protein                                                                                                                 |
| ORF8            | Accessory protein                                                                                                                 |
| N               | Nucleocapsid protein, forms complexes with genomic RNA, interact with M protein for viral assembly                                |
| ORF 9a          | Accessory protein                                                                                                                 |
| ORF 9b          | Accessory protein                                                                                                                 |
| ORF 10          | Accessory protein                                                                                                                 |

58

59 **Supplementary Table 6.** Coding of potential and putative transcription regulatory sequences  
60 of the genome sequence of WHCV.

| ORF | Location (nt)               | Length (nt) | Length (aa) | TRS location | TRS sequence (s) (distance in bases to AUG)         |
|-----|-----------------------------|-------------|-------------|--------------|-----------------------------------------------------|
| 1ab | 266-21,555 (shift at13,468) | 21,290      | 7,096       | 64           | <b>CUCUAAACGAACUU</b> (188) <sup>a</sup> <u>AUG</u> |
| S   | 21,563-25,384               | 3,822       | 1,273       | 21,550       | <b>AACUAAACGAACA</b> <u>AUG</u>                     |
| 3a  | 25,393-26,220               | 828         | 275         | 25,379       | <b>ACAUAAACGAACUU</b> <u>AUG</u>                    |
| 3b  | 25,765-26,220               | 456         | 151         |              |                                                     |
| E   | 26,245-26,472               | 228         | 75          | 26,231       | <b>AUGAGUACGAACUU</b> <u>AUG</u>                    |
| M   | 26,523-27,191               | 669         | 222         | 26,467       | <b>GUCUAAACGAACUA</b> (42) <sup>a</sup> <u>AUG</u>  |
| 6   | 27,202-27,387               | 186         | 61          | 27,035       | <b>UACAUCACGAACGC</b> (153) <sup>a</sup> <u>AUG</u> |
| 7a  | 27,394-27,759               | 366         | 121         | 27,382       | <b>GAUAAAACGAACA</b> <u>AUG</u>                     |
| 7b  | 27,756-27,887               | 132         | 43          |              |                                                     |
| 8   | 27,894-28,259               | 366         | 121         | 27,882       | <b>GCCUAAACGAACA</b> <u>AUG</u>                     |
| N   | 28,274-29,533               | 1,260       | 419         | 28,254       | <b>AUCUAAACGAACAA</b> (6) <sup>a</sup> <u>AUG</u>   |
| 9a  | 28,284-28,577               | 294         | 97          |              |                                                     |
| 9b  | 28,734-28,955               | 222         | 73          |              |                                                     |
| 10  | 29,558-29,674               | 117         | 38          | 29,528       | <b>GCCUAAACUCAUGC</b> (16) <sup>a</sup> <u>AUG</u>  |

61 <sup>a</sup>Numbers in parentheses represent the number of nucleotides to the putative start codon. Start codons are  
62 underlined. The conserved TRS core sequence, ACGAAC or CUAAAC, is highlighted in bold.

63 **Supplementary Table 7.** Amino acid identities of the RBD sequence between SARS- and bat SARS-like CoVs.

|                          | 1    | 2    | 3    | 4    | 5    | 6    | 7    | 8    | 9    | 10   | 11   | 12   | 13   |
|--------------------------|------|------|------|------|------|------|------|------|------|------|------|------|------|
| <b>1. SARS-CoV_Tor2</b>  |      | 100  | 100  | 97.9 | 96.4 | 95.4 | 80.9 | 73.8 | 62.4 | 62.4 | 62.4 | 61.9 | 62.9 |
| <b>2. SARS-CoV_BJ01</b>  | 100  |      | 100  | 97.9 | 96.4 | 95.4 | 80.9 | 73.8 | 62.4 | 62.4 | 62.4 | 61.9 | 62.9 |
| <b>3. SARS-CoV_WH20</b>  | 100  | 100  |      | 97.9 | 96.4 | 95.4 | 80.9 | 73.8 | 62.4 | 62.4 | 62.4 | 61.9 | 62.9 |
| <b>4. SARS-CoV_SZ3</b>   | 97.9 | 97.9 | 97.9 |      | 96.9 | 95.9 | 82.0 | 74.9 | 62.4 | 62.4 | 62.4 | 61.9 | 62.9 |
| <b>5. Bat_SL_Rs7327</b>  | 96.4 | 96.4 | 96.4 | 96.9 |      | 97.9 | 83.0 | 75.9 | 62.9 | 62.4 | 62.9 | 61.9 | 63.4 |
| <b>6. Bat_SL_Rs4874</b>  | 95.4 | 95.4 | 95.4 | 95.9 | 97.9 |      | 82.0 | 76.4 | 63.4 | 63.4 | 63.4 | 62.9 | 63.9 |
| <b>7. Bat_SL_Rs4231</b>  | 80.9 | 80.9 | 80.9 | 82.0 | 83.0 | 82.0 |      | 76.9 | 62.4 | 62.4 | 62.4 | 61.9 | 62.9 |
| <b>8. WH-human 1</b>     | 73.8 | 73.8 | 73.8 | 74.9 | 75.9 | 76.4 | 76.9 |      | 63.6 | 64.1 | 64.1 | 63.6 | 64.6 |
| <b>9. Bat_SL_CoVZC45</b> | 62.4 | 62.4 | 62.4 | 62.4 | 62.9 | 63.4 | 62.4 | 63.6 |      | 91.5 | 95.5 | 88.6 | 91.0 |
| <b>10. Bat_SL_Rp3</b>    | 62.4 | 62.4 | 62.4 | 62.4 | 62.4 | 63.4 | 62.4 | 64.1 | 91.5 |      | 90.3 | 96.0 | 95.5 |
| <b>11. Bat_SL_Rf1</b>    | 62.4 | 62.4 | 62.4 | 62.4 | 62.9 | 63.4 | 62.4 | 64.1 | 95.5 | 90.3 |      | 88.1 | 89.3 |
| <b>12. Bat_SL_Rm1</b>    | 61.9 | 61.9 | 61.9 | 61.9 | 61.9 | 62.9 | 61.9 | 63.6 | 88.6 | 96.0 | 88.1 |      | 92.7 |
| <b>13. Bat_SL_HKU3</b>   | 62.9 | 62.9 | 62.9 | 62.9 | 63.4 | 63.9 | 62.9 | 64.6 | 91.0 | 95.5 | 89.3 | 92.7 |      |

64

65 **Supplementary Table 8.** PCR primers used in this study.

| Primer name                                | Sequence (5'-3')            | Region/Size |
|--------------------------------------------|-----------------------------|-------------|
| A. Primers for entire genome amplification |                             |             |
| WHCV-F1                                    | CCAGGTAACAAACCAACCAACTT     | 36-58       |
| WHCV-R1                                    | GGCAACCAACATAAGAGAACACAC    | 1507-1530   |
| WHCV-F2                                    | CAACCAAATGTGCCTTTCAACTC     | 1217-1239   |
| WHCV-R2                                    | CACAGTGTATCACCAAAAGTAACCT   | 2746-2771   |
| WHCV-F3                                    | TGTCACGCACTCAAAGGGATT       | 2408-2428   |
| WHCV-R3                                    | GACAGCTAAGTAGACATTTGTGCGAA  | 3787-3812   |
| WHCV-F4                                    | ATGCCATGCAAGTTGAATCTGAT     | 3523-3545   |
| WHCV-R4                                    | TGCGTGTGGAGGTTAATGTTGT      | 5005-5026   |
| WHCV-F5                                    | GATCTCTCAAAGTGCCAGCTACAGT   | 4681-4705   |
| WHCV-R5                                    | TTATAATCAATAGCCACCACATCACC  | 6174-6199   |
| WHCV-F6                                    | AGAAACTTTGTATTGCATAGACGGTG  | 5807-5832   |
| WHCV-R6                                    | ACCAGTACAGTAAGAAGGCATGCC    | 7053-7076   |
| WHCV-F7                                    | GTTTAGCTGCTGTTAATAGTGCCCTT  | 6658-6684   |
| WHCV-R7                                    | TGCAACTTCCGCACTATCACC       | 8022-8042   |
| WHCV-F8                                    | TCCTACTGACCAGTCTTCTTACATCGT | 7727-7753   |
| WHCV-R8                                    | TTTACAAGTGCCGTGCCTAC        | 9232-9252   |
| WHCV-F9                                    | GGTTTGCCTGGCACGATATTAC      | 8883-8904   |
| WHCV-R9                                    | ACTTAGGTGTCTTAGGATTGGCTGTAT | 10345-10371 |
| WHCV-F10                                   | TTGTCATCTCGCAAAGGCTCT       | 9974-9994   |
| WHCV-R10                                   | GAGATTATAAGAGCCCACATGGAAA   | 11473-11497 |
| WHCV-F11                                   | GCTATGGGTATTATTGCTATGTCTGCT | 11124-11150 |
| WHCV-R11                                   | TGGATTTCCCACAATGCTGAT       | 12557-12577 |
| WHCV-F12                                   | CTGATCAAGCTATGACCCAAATGT    | 12295-12318 |
| WHCV-R12                                   | GCAACAGCTGGACAATCCTTAAGT    | 13723-13746 |
| WHCV-F13                                   | TCTGCGGTATGTGGAAAGGTTAT     | 13396-13418 |
| WHCV-R13                                   | GTCAGCAGCATACACAAGTAATTCCT  | 14562-14587 |
| WHCV-F14                                   | AGGGCTTTAACTGCAGAGTCACAT    | 14201-14224 |
| WHCV-R14                                   | GCGGACATACTTATCGGCAATT      | 15598-15619 |
| WHCV-F15                                   | TCAATAGCCGCCACTAGAGGAG      | 15188-15209 |
| WHCV-R15                                   | TCACCAGCATTTGTCCAGTCAC      | 16587-16608 |
| WHCV-F16                                   | TTGGGGCTTGTGTTCTTTGC        | 16257-16276 |
| WHCV-R16                                   | CAAGCAGGGTTACGTGTAAGGAAT    | 17746-17769 |
| WHCV-F17                                   | TGTCAATGCCAGATTACGTGCT      | 17410-17431 |
| WHCV-R17                                   | TAACAAAGCACTCGTGGACAGC      | 18896-18917 |
| WHCV-F18                                   | TATGGGCACATGGCTTTGAGT       | 18609-18629 |
| WHCV-R18                                   | TAAGAACACCATTACGGGCATTT     | 20041-20063 |
| WHCV-F19                                   | TTGATGGACAACAGGGTGAAGTAC    | 19680-19703 |
| WHCV-R19                                   | CGAAGTGTCCCATGAGCTTATAAA    | 21213-21236 |



|          |                             |             |
|----------|-----------------------------|-------------|
| WHCV-F20 | AGGAGTTGCACCAGGTACAGCT      | 20902-20923 |
| WHCV-R20 | ACCCACATAATAAGCTGCAGCAC     | 22360-22382 |
| WHCV-F21 | CTATTAATTTAGTGCATGATCTCCCTC | 22204-22230 |
| WHCV-R21 | AAATTTGTGGGTATGGCAATAGAGTTA | 23705-23731 |
| WHCV-F22 | ACTTACTCCTACTTGGCGTGTTTATTC | 23462-23488 |
| WHCV-R22 | GCATTAATGCCAGAGATGTCACC     | 25077-25099 |
| WHCV-F23 | CTATCATCTTATGTCCTCCCTCAGTC  | 24716-24742 |
| WHCV-R23 | TAGTCGTCGTCGGTTCATCATAAAT   | 26195-26219 |
| WHCV-F24 | TACTTCAGGTGATGGCACAACAA     | 25915-25937 |
| WHCV-R24 | AAGCTCACAAGTAGCGAGTGTTATCA  | 27435-27460 |
| WHCV-F25 | CGTGTAGCAGGTGACTCAGGTTT     | 27094-27116 |
| WHCV-R25 | TACCGTCACCACCACGAATTC       | 28567-28587 |
| WHCV-F26 | GGACCCCAAATCAGCGAAAT        | 28302-28322 |
| WHCV-R26 | AAAATCACATGGGGATAGCACTACT   | 29840-29864 |

#### B. Primers for WHCV detection

|         |                      |       |
|---------|----------------------|-------|
| S1423F  | GCCGGTAGCACACCTTGTA  | 314bp |
| S1736R2 | GGATCACGGACAGCATCAGT |       |
| S1869R1 | AGCAACAGGGACTTCTGTGC |       |
| S2620F  | ACTTCTGCACTGTTAGCGGG | 555bp |
| S3174R2 | ATGAGGTGCTGACTGAGGGA |       |
| S3240R1 | GGCAGGAGCAGTTGTGAAGT |       |

#### C. Primers for WHCV detection using qPCR

(designed based on the whole genome of WHCV (MN908947.3))

|        |                              |             |
|--------|------------------------------|-------------|
| WHCV-F | TGATGATACTCTCTGACGATGCTGT    | 15704-15728 |
| WHCV-R | CTCAGTCCAACATTTTGCTTCAGA     | 15823-15846 |
| WHCV-P | ROX-ATGCATCTCAAGGTCTAGTG-MGB | 15749-15768 |

#### D. Primers used in 5'/3' RACE

|        |                              |                     |
|--------|------------------------------|---------------------|
| 5-GSP  | CCACATGAGGGACAAGGACACCAAGTG  | 573-599 (599bp)     |
| 5-GSPn | CATGACCATGAGGTGCAGTTCGAGC    | 491-515 (515bp)     |
| 3-GSP  | TGTCGCGCATTGGCATGGAAGTCACACC | 29212-29239 (688bp) |
| 3-GSPn | CTCAAGCCTTACCGCAGAGACAGAAG   | 29398-29423 (502bp) |

#### E. Primers for detection of other respiratory pathogens using qPCR

|                        |                                      |  |
|------------------------|--------------------------------------|--|
| 1012FluA-Fv1           | GGARTGGMTAAAGACAAGACCAATC            |  |
| 1012FluA-Rv1           | GGCRTTYTGACAAAACGCTCTAC              |  |
| 1012FluA-Pv1           | ROX-AGTCCTCGCTCACTGGGCACGGT-BHQ2     |  |
| 1083FluB-Fv*           | AGACCAGAGGGAAACTATGCCC               |  |
| 1083FluB-Rv*           | TCCGGATGTAACAGGTCTGACTT              |  |
| 1083FluB-Pv*(Victoria) | CY5-CAGACCAAATGCACGGGGAAHATACC-BHQ1  |  |
| 1083FluB-Pv*(Yamagata) | FAM-CAGRCCAATGTGTGTGGGGAYCACACC-BHQ1 |  |

|              |                                         |
|--------------|-----------------------------------------|
| 1111HADV-Fv1 | GCCACGGTGGGGTTTCTAAACTT                 |
| 1111HADV-Rv1 | GCCCCAGTGGTCTTACATGCACATC               |
| 1111HADV-Pv1 | FAM-TGCACCAGACCCGGGCTCAGGTACTCCGA-TAMRA |
| 1281CPn-Fv3  | AGCACAAACACCTCAGACTACAC                 |
| 1281CPn-Rv3  | AGAACAATGCCGATTCCTAAG                   |
| 1281CPn-Pv3  | FAM-ACAACCATCAGTATCTCACAAGGCAACAC-BHQ1  |

---
